# Supplementary material for: History of antibiotic adaptation influences microbial evolutionary dynamics during subsequent treatment
Source: PubMed Central journal article supplement (PMC5549691; doi:10.1371/journal.pbio.2001586), 2017-08-08
Supplement: pbio.2001586.s002.pdf [file pbio.2001586.s002.pdf]

## Supplementary Materials (S2 Text) for

### History of Antibiotic Adaptation Influences Microbial Evolutionary Dynamics During Subsequent Treatment

Phillip Yen and Jason Papin\*

\*Corresponding author. E-mail: papin@virginia.edu

**This file contains the calculations for all statistical tests performed in this study:**

#### **Drug order-specific effects (Fig 3 of main text)**

[Fig 3A \(top\) \(PIP<sup>R</sup> lineages\)](#)  
[Fig 3A \(middle\) \(TOB<sup>R</sup> lineages\)](#)  
[Fig 3A \(bottom\) \(CIP<sup>R</sup> lineages\)](#)  
[Fig 3A \(bottom\) for Day 25 \(CIP<sup>R</sup> lineages\)](#)  
[Fig 3B](#)  
[Fig 3C \(top\)](#)  
[Fig 3C \(middle\)](#)  
[Fig 3C \(bottom\)](#)

#### **Collateral sensitivity (S4 Fig)**

[S4A Fig \(left\)](#)  
[S4A Fig \(right\)](#)  
[S4B Fig](#)  
[S4C Fig](#)

#### **Piperacillin-resistant clinical isolates (Fig 7 of main text)**

[Clinical Isolate #1](#)  
[Clinical Isolate #2](#)  
[Clinical Isolate #3](#)

#### **Hocquet Isolates (Fig 8 of main text)**

[A<sub>WT</sub> vs. A<sub>PM</sub>](#)  
[B<sub>WT</sub> vs. B<sub>PM</sub>](#)  
[C<sub>WT</sub> vs. C<sub>PM</sub>](#)  
[D<sub>WT</sub> vs. D<sub>PM</sub>](#)

## Drug order-specific effects (Fig 3 of main text)

**Fig 3A (top) (PIP<sup>R</sup> lineages)**

| <b>log<sub>2</sub> MIC<sub>PIP</sub> of:</b> | <b>Replicate</b> |          |          |          |
|----------------------------------------------|------------------|----------|----------|----------|
|                                              | <b>1</b>         | <b>2</b> | <b>3</b> | <b>4</b> |
| Day 1 PIP <sup>R</sup>                       | 2                | 3        | 3        | 2        |
| Day 20 PIP <sup>R</sup>                      | 9                | 7        | 7        | 7        |
| Day 40 PIP <sup>R</sup> LB                   | 8                | 6        | 5        | 6        |
| Day 40 PIP <sup>R</sup> TOB <sup>R</sup>     | 8                | 7        | 6        | 5        |
| Day 40 PIP <sup>R</sup> CIP <sup>R</sup>     | 7                | 0        | 4        | 4        |

A one-way ANOVA is performed (`anova1` in MATLAB) on the log<sub>2</sub> MIC<sub>PIP</sub> values of these lineages:

| <b>ANOVA Table</b> |       |    |        |      |        |
|--------------------|-------|----|--------|------|--------|
| Source             | SS    | df | MS     | F    | Prob>F |
| Columns            | 69.7  | 4  | 17.425 | 6.79 | 0.0025 |
| Error              | 38.5  | 15 | 2.5667 |      |        |
| Total              | 108.2 | 19 |        |      |        |

We also performed the non-parametric Kruskal-Wallis test (in R):

```
> kruskal.test(value ~ lineage, data = Fig3AtopPIPR)
```

```
Kruskal-wallis rank sum test
```

```
data: value by lineage
```

```
Kruskal-wallis chi-squared = 12.063, df = 4, p-value = 0.01689
```

With an ANOVA p-value of **0.0025**, and a Kruskal-Wallis p-value of **0.01689**, the treatments are significantly different at the  $\alpha=0.05$  level, and we continue with multiple comparisons testing with the Tukey HSD test (`multcompare` in MATLAB), and the Dunn's test (`PMCMR` package in R).

| log <sub>2</sub> MIC <sub>PIP</sub> of:  |                                              | lower bound  | difference between means | upper bound | Tukey HSD p-value | Dunn's Test p-value |
|------------------------------------------|----------------------------------------------|--------------|--------------------------|-------------|-------------------|---------------------|
| Day 1 PIP <sup>R</sup>                   | Day 20 PIP <sup>R</sup>                      | -8.50        | -5.00                    | -1.50       | 0.0039            | 0.0021              |
| Day 1 PIP <sup>R</sup>                   | Day 40 PIP <sup>R</sup> LB                   | -7.25        | -3.75                    | -0.25       | 0.0329            | 0.0344              |
| Day 1 PIP <sup>R</sup>                   | Day 40 PIP <sup>R</sup> TOB <sup>R</sup>     | -7.50        | -4.00                    | -0.50       | 0.0216            | 0.0184              |
| <b>Day 1 PIP<sup>R</sup></b>             | <b>Day 40 PIP<sup>R</sup>CIP<sup>R</sup></b> | <b>-4.75</b> | <b>-1.25</b>             | <b>2.25</b> | <b>0.8022</b>     | 0.3647              |
| <b>Day 20 PIP<sup>R</sup></b>            | <b>Day 40 PIP<sup>R</sup>LB</b>              | <b>-2.25</b> | <b>1.25</b>              | <b>4.75</b> | <b>0.8022</b>     | 0.3337              |
| <b>Day 20 PIP<sup>R</sup></b>            | <b>Day 40 PIP<sup>R</sup>TOB<sup>R</sup></b> | <b>-2.50</b> | <b>1.00</b>              | <b>4.50</b> | <b>0.8989</b>     | 0.4684              |
| <b>Day 20 PIP<sup>R</sup></b>            | <b>Day 40 PIP<sup>R</sup>CIP<sup>R</sup></b> | <b>0.25</b>  | <b>3.75</b>              | <b>7.25</b> | <b>0.0329</b>     | 0.0296              |
| Day 40 PIP <sup>R</sup> LB               | Day 40 PIP <sup>R</sup> TOB <sup>R</sup>     | -3.75        | -0.25                    | 3.25        | 0.9994            | 0.8090              |
| Day 40 PIP <sup>R</sup> LB               | Day 40 PIP <sup>R</sup> CIP <sup>R</sup>     | -1.00        | 2.50                     | 6.00        | 0.2296            | 0.2269              |
| Day 40 PIP <sup>R</sup> TOB <sup>R</sup> | Day 40 PIP <sup>R</sup> CIP <sup>R</sup>     | -0.75        | 2.75                     | 6.25        | 0.1612            | 0.1470              |

**Fig 3A (middle) (TOB<sup>R</sup> lineages)**

| log <sub>2</sub> MIC <sub>TOB</sub> of:  | Replicate |   |   |   |
|------------------------------------------|-----------|---|---|---|
|                                          | 1         | 2 | 3 | 4 |
| Day 1 TOB <sup>R</sup>                   | 1         | 1 | 1 | 1 |
| Day 20 TOB <sup>R</sup>                  | 7         | 6 | 8 | 7 |
| Day 40 TOB <sup>R</sup> LB               | 4         | 3 | 3 | 4 |
| Day 40 TOB <sup>R</sup> PIP <sup>R</sup> | 5         | 6 | 4 | 6 |
| Day 40 TOB <sup>R</sup> CIP <sup>R</sup> | 3         | 3 | 3 | 4 |

A one-way ANOVA is performed (`anova1` in MATLAB) on the log<sub>2</sub> MIC<sub>TOB</sub> values of these lineages:

| ANOVA Table |      |    |        |       |              |
|-------------|------|----|--------|-------|--------------|
| Source      | SS   | df | MS     | F     | Prob>F       |
| Columns     | 81.5 | 4  | 20.375 | 47.02 | 2.59048e-008 |
| Error       | 6.5  | 15 | 0.4333 |       |              |
| Total       | 88   | 19 |        |       |              |

We also performed the non-parametric Kruskal-Wallis test (in R):

```
> kruskal.test(value ~ lineage, data = Fig3AmiddleTOBR)
```

```
Kruskal-wallis rank sum test
```

```
data: value by lineage
```

```
Kruskal-wallis chi-squared = 17.303, df = 4, p-value = 0.001687
```

With an ANOVA p-value of  $2.6 \times 10^{-8}$  and a Kruskal-Wallis p-value of **0.001687**, the treatments are significantly different at the alpha=0.05 level, and we continue with multiple comparisons testing with the Tukey HSD test (`multcompare` in MATLAB), and the Dunn's test (PMCMR package in R).

| log <sub>2</sub> MIC <sub>TOB</sub> of:      |                                              | lower bound  | difference between means | upper bound  | Tukey HSD p-value | Dunn's Test p-value |
|----------------------------------------------|----------------------------------------------|--------------|--------------------------|--------------|-------------------|---------------------|
| Day 1 TOB <sup>R</sup>                       | Day 20 TOB <sup>R</sup>                      | -7.44        | -6.00                    | -4.56        | 2.46E-08          | 0.00013             |
| Day 1 TOB <sup>R</sup>                       | Day 40 TOB <sup>R</sup> LB                   | -3.94        | -2.50                    | -1.06        | 0.0006            | 0.10068             |
| Day 1 TOB <sup>R</sup>                       | Day 40 TOB <sup>R</sup> PIP <sup>R</sup>     | -5.69        | -4.25                    | -2.81        | 1.44E-06          | 0.00388             |
| Day 1 TOB <sup>R</sup>                       | Day 40 TOB <sup>R</sup> CIP <sup>R</sup>     | -3.69        | -2.25                    | -0.81        | 0.0017            | 0.17132             |
| <b>Day 20 TOB<sup>R</sup></b>                | <b>Day 40 TOB<sup>R</sup>LB</b>              | <b>2.06</b>  | <b>3.50</b>              | <b>4.94</b>  | <b>1.58E-05</b>   | 0.02861             |
| <b>Day 20 TOB<sup>R</sup></b>                | <b>Day 40 TOB<sup>R</sup>PIP<sup>R</sup></b> | <b>0.31</b>  | <b>1.75</b>              | <b>3.19</b>  | <b>0.0139</b>     | 0.34600             |
| <b>Day 20 TOB<sup>R</sup></b>                | <b>Day 40 TOB<sup>R</sup>CIP<sup>R</sup></b> | <b>2.31</b>  | <b>3.75</b>              | <b>5.19</b>  | <b>6.86E-06</b>   | 0.01380             |
| <b>Day 40 TOB<sup>R</sup>LB</b>              | <b>Day 40 TOB<sup>R</sup>PIP<sup>R</sup></b> | <b>-3.19</b> | <b>-1.75</b>             | <b>-0.31</b> | <b>0.0139</b>     | 0.21263             |
| <b>Day 40 TOB<sup>R</sup>LB</b>              | <b>Day 40 TOB<sup>R</sup>CIP<sup>R</sup></b> | <b>-1.19</b> | <b>0.25</b>              | <b>1.69</b>  | <b>0.9819</b>     | 0.78440             |
| <b>Day 40 TOB<sup>R</sup>PIP<sup>R</sup></b> | <b>Day 40 TOB<sup>R</sup>CIP<sup>R</sup></b> | <b>0.56</b>  | <b>2.00</b>              | <b>3.44</b>  | <b>0.0049</b>     | 0.12852             |

**Fig 3A (bottom) (CIP<sup>R</sup> lineages)**

| log <sub>2</sub> MIC <sub>CIP</sub> of:  | Replicate |    |    |    |
|------------------------------------------|-----------|----|----|----|
|                                          | 1         | 2  | 3  | 4  |
| Day 1 CIP <sup>R</sup>                   | -1        | -2 | -3 | -1 |
| Day 20 CIP <sup>R</sup>                  | 5         | 4  | 4  | 4  |
| Day 40 CIP <sup>R</sup> LB               | 3         | 4  | -1 | 2  |
| Day 40 CIP <sup>R</sup> PIP <sup>R</sup> | 1         | 1  | 2  | 1  |
| Day 40 CIP <sup>R</sup> TOB <sup>R</sup> | 2         | -1 | 2  | -1 |

A one-way ANOVA is performed (`anova1` in MATLAB) on the log<sub>2</sub> MIC<sub>CIP</sub> values of these lineages:

| ANOVA Table |        |    |        |       |        |
|-------------|--------|----|--------|-------|--------|
| Source      | SS     | df | MS     | F     | Prob>F |
| Columns     | 76.5   | 4  | 19.125 | 10.53 | 0.0003 |
| Error       | 27.25  | 15 | 1.8167 |       |        |
| Total       | 103.75 | 19 |        |       |        |

We also performed the non-parametric Kruskal-Wallis test (in R):

```
> kruskal.test(value ~ lineage, data = Fig3AbottomCIPR)
```

```
Kruskal-wallis rank sum test
```

```
data: value by lineage
```

```
Kruskal-wallis chi-squared = 13.966, df = 4, p-value = 0.007406
```

With an ANOVA p-value of **0.0003** and a Kruskal-Wallis p-value of **0.007406**, the treatments are significantly different at the alpha=0.05 level, and we continue with multiple comparisons testing with the Tukey HSD test (`multcompare` in MATLAB), and the Dunn's test (`PMCMR` package in R).

| log <sub>2</sub> MIC <sub>CIP</sub> of:  |                                              | lower bound  | difference between means | upper bound | Tukey HSD p-value | Dunn's Test p-value |
|------------------------------------------|----------------------------------------------|--------------|--------------------------|-------------|-------------------|---------------------|
| Day 1 CIP <sup>R</sup>                   | Day 20 CIP <sup>R</sup>                      | -8.94        | -6.00                    | -3.06       | 0.0001            | 0.0003              |
| Day 1 CIP <sup>R</sup>                   | Day 40 CIP <sup>R</sup> LB                   | -6.69        | -3.75                    | -0.81       | 0.0099            | 0.0245              |
| Day 1 CIP <sup>R</sup>                   | Day 40 CIP <sup>R</sup> PIP <sup>R</sup>     | -5.94        | -3.00                    | -0.06       | 0.0447            | 0.1073              |
| Day 1 CIP <sup>R</sup>                   | Day 40 CIP <sup>R</sup> TOB <sup>R</sup>     | -5.19        | -2.25                    | 0.69        | 0.1799            | 0.1812              |
| <b>Day 20 CIP<sup>R</sup></b>            | <b>Day 40 CIP<sup>R</sup>LB</b>              | <b>-0.69</b> | <b>2.25</b>              | <b>5.19</b> | <b>0.1799</b>     | 0.1715              |
| <b>Day 20 CIP<sup>R</sup></b>            | <b>Day 40 CIP<sup>R</sup>PIP<sup>R</sup></b> | <b>0.06</b>  | <b>3.00</b>              | <b>5.94</b> | <b>0.0447</b>     | 0.0449              |
| <b>Day 20 CIP<sup>R</sup></b>            | <b>Day 40 CIP<sup>R</sup>TOB<sup>R</sup></b> | <b>0.81</b>  | <b>3.75</b>              | <b>6.69</b> | <b>0.0099</b>     | 0.0227              |
| <b>Day 40 CIP<sup>R</sup>LB</b>          | <b>Day 40 CIP<sup>R</sup>PIP<sup>R</sup></b> | <b>-2.19</b> | <b>0.75</b>              | <b>3.69</b> | <b>0.9305</b>     | 0.5234              |
| <b>Day 40 CIP<sup>R</sup>LB</b>          | <b>Day 40 CIP<sup>R</sup>TOB<sup>R</sup></b> | <b>-1.44</b> | <b>1.50</b>              | <b>4.44</b> | <b>0.5345</b>     | 0.3620              |
| Day 40 CIP <sup>R</sup> PIP <sup>R</sup> | Day 40 CIP <sup>R</sup> TOB <sup>R</sup>     | -2.19        | 0.75                     | 3.69        | 0.9305            | 0.7845              |

**Fig 3A (bottom) for Day 25 (CIP<sup>R</sup> lineages)**

| log <sub>2</sub> MIC <sub>CIP</sub> of:  | Replicate |    |    |    |
|------------------------------------------|-----------|----|----|----|
|                                          | 1         | 2  | 3  | 4  |
| Day 1 CIP <sup>R</sup>                   | -1        | -2 | -3 | -1 |
| Day 20 CIP <sup>R</sup>                  | 5         | 4  | 4  | 4  |
| Day 25 CIP <sup>R</sup> LB               | 2         | 5  | 2  | 3  |
| Day 25 CIP <sup>R</sup> PIP <sup>R</sup> | 0         | -1 | 2  | -1 |
| Day 25 CIP <sup>R</sup> TOB <sup>R</sup> | 6         | 3  | 4  | 4  |

A one-way ANOVA is performed (anova1 in MATLAB) on the log<sub>2</sub> MIC<sub>CIP</sub> values of these lineages:

| ANOVA Table |        |    |        |       |              |
|-------------|--------|----|--------|-------|--------------|
| Source      | SS     | df | MS     | F     | Prob>F       |
| Columns     | 116.7  | 4  | 29.175 | 21.61 | 4.39215e-006 |
| Error       | 20.25  | 15 | 1.35   |       |              |
| Total       | 136.95 | 19 |        |       |              |

We also performed the non-parametric Kruskal-Wallis test (in R):

```
> kruskal.test(value ~ lineage, data = Fig3AbottomCIPR_day25)
```

```
Kruskal-wallis rank sum test
```

```
data: value by lineage
```

```
Kruskal-wallis chi-squared = 15.179, df = 4, p-value = 0.004345
```

With an ANOVA p-value of  $4.4 \times 10^{-6}$  and a Kruskal-Wallis p-value of **0.004345**, the treatments are significantly different at the alpha=0.05 level, and we continue with multiple comparisons testing with the Tukey HSD test (multcompare in MATLAB), and the Dunn's test (PMCMR package in R).

| log <sub>2</sub> MIC <sub>CIP</sub> of:  |                                              | lower bound  | difference between means | upper bound | Tukey HSD p-value | Dunn's Test p-value |
|------------------------------------------|----------------------------------------------|--------------|--------------------------|-------------|-------------------|---------------------|
| Day 1 CIP <sup>R</sup>                   | Day 20 CIP <sup>R</sup>                      | -8.54        | -6.00                    | -3.46       | 2.23E-05          | 0.0018              |
| Day 1 CIP <sup>R</sup>                   | Day 25 CIP <sup>R</sup> LB                   | -7.29        | -4.75                    | -2.21       | 0.0003            | 0.0292              |
| Day 1 CIP <sup>R</sup>                   | Day 25 CIP <sup>R</sup> PIP <sup>R</sup>     | -4.29        | -1.75                    | 0.79        | 0.2581            | 0.4309              |
| Day 1 CIP <sup>R</sup>                   | Day 25 CIP <sup>R</sup> TOB <sup>R</sup>     | -8.54        | -6.00                    | -3.46       | 2.23E-05          | 0.0027              |
| <b>Day 20 CIP<sup>R</sup></b>            | <b>Day 25 CIP<sup>R</sup>LB</b>              | <b>-1.29</b> | <b>1.25</b>              | <b>3.79</b> | <b>0.5651</b>     | 0.3477              |
| <b>Day 20 CIP<sup>R</sup></b>            | <b>Day 25 CIP<sup>R</sup>PIP<sup>R</sup></b> | <b>1.71</b>  | <b>4.25</b>              | <b>6.79</b> | <b>0.0009</b>     | 0.0197              |
| <b>Day 20 CIP<sup>R</sup></b>            | <b>Day 25 CIP<sup>R</sup>TOB<sup>R</sup></b> | <b>-2.54</b> | <b>0.00</b>              | <b>2.54</b> | <b>1.0000</b>     | 0.9036              |
| Day 25 CIP <sup>R</sup> LB               | Day 25 CIP <sup>R</sup> PIP <sup>R</sup>     | 0.46         | 3.00                     | 5.54        | 0.0171            | 0.1635              |
| Day 25 CIP <sup>R</sup> LB               | Day 25 CIP <sup>R</sup> TOB <sup>R</sup>     | -3.79        | -1.25                    | 1.29        | 0.5651            | 0.4134              |
| Day 25 CIP <sup>R</sup> PIP <sup>R</sup> | Day 25 CIP <sup>R</sup> TOB <sup>R</sup>     | -6.79        | -4.25                    | -1.71       | 9.19E-04          | 0.0270              |

**Fig 3B**

| log <sub>2</sub> MIC <sub>TOB</sub> of:  | Replicate |   |   |   |
|------------------------------------------|-----------|---|---|---|
|                                          | 1         | 2 | 3 | 4 |
| Day 20 PIP <sup>R</sup>                  | 1         | 1 | 2 | 3 |
| Day 40 PIP <sup>R</sup> TOB <sup>R</sup> | 4         | 3 | 4 | 7 |
| Day 1 TOB <sup>R</sup>                   | 1         | 1 | 1 | 1 |
| Day 20 TOB <sup>R</sup>                  | 7         | 6 | 8 | 7 |

A one-way ANOVA is performed (`anova1` in MATLAB) on the log<sub>2</sub> MIC<sub>TOB</sub> values of these lineages:

| ANOVA Table |         |    |         |       |              |
|-------------|---------|----|---------|-------|--------------|
| Source      | SS      | df | MS      | F     | Prob>F       |
| Columns     | 90.188  | 3  | 30.0625 | 26.24 | 1.48008e-005 |
| Error       | 13.75   | 12 | 1.1458  |       |              |
| Total       | 103.938 | 15 |         |       |              |

We also performed the non-parametric Kruskal-Wallis test (in R):

```
> kruskal.test(value ~ lineage, data = Fig3B)
```

```
Kruskal-wallis rank sum test
```

```
data: value by lineage
```

```
Kruskal-wallis chi-squared = 12.987, df = 3, p-value = 0.004665
```

With an ANOVA p-value of  $1.48 \times 10^{-5}$  and a Kruskal-Wallis p-value of **0.004665**, the treatments are significantly different at the  $\alpha=0.05$  level, and we continue with multiple comparisons testing with the Tukey HSD test (`multcompare` in MATLAB), and the Dunn's test (PMCMR package in R).

| log <sub>2</sub> MIC <sub>TOB</sub> of:      |                                          | lower bound  | difference between means | upper bound  | Tukey HSD p-value | Dunn's Test p-value |
|----------------------------------------------|------------------------------------------|--------------|--------------------------|--------------|-------------------|---------------------|
| Day 20 PIP <sup>R</sup>                      | Day 40 PIP <sup>R</sup> TOB <sup>R</sup> | -5.00        | -2.75                    | -0.50        | 0.0157            | 0.1077              |
| <b>Day 20 PIP<sup>R</sup></b>                | <b>Day 1 TOB<sup>R</sup></b>             | <b>-1.50</b> | <b>0.75</b>              | <b>3.00</b>  | <b>0.7573</b>     | 0.5149              |
| Day 20 PIP <sup>R</sup>                      | Day 20 TOB <sup>R</sup>                  | -7.50        | -5.25                    | -3.00        | 8.04E-05          | 0.0103              |
| Day 40 PIP <sup>R</sup> TOB <sup>R</sup>     | Day 1 TOB <sup>R</sup>                   | 1.25         | 3.50                     | 5.75         | 0.0028            | 0.0238              |
| <b>Day 40 PIP<sup>R</sup>TOB<sup>R</sup></b> | <b>Day 20 TOB<sup>R</sup></b>            | <b>-4.75</b> | <b>-2.50</b>             | <b>-0.25</b> | <b>0.0280</b>     | 0.3383              |
| Day 1 TOB <sup>R</sup>                       | Day 20 TOB <sup>R</sup>                  | -8.25        | -6.00                    | -3.75        | 2.14E-05          | 0.0013              |

**Fig 3C (top)**

| log <sub>2</sub> MIC <sub>PIP</sub> of:  | Replicate |   |   |   |
|------------------------------------------|-----------|---|---|---|
|                                          | 1         | 2 | 3 | 4 |
| Day 1 PIP <sup>R</sup>                   | 2         | 3 | 3 | 2 |
| Day 40 PIP <sup>R</sup> CIP <sup>R</sup> | 7         | 0 | 4 | 4 |
| Day 1 CIP <sup>R</sup>                   | 3         | 4 | 3 | 4 |
| Day 40 CIP <sup>R</sup> PIP <sup>R</sup> | 9         | 7 | 8 | 8 |

A one-way ANOVA is performed (`anova1` in MATLAB) on the log<sub>2</sub> MIC<sub>PIP</sub> values of these lineages:

| ANOVA Table |         |    |         |     |        |
|-------------|---------|----|---------|-----|--------|
| Source      | SS      | df | MS      | F   | Prob>F |
| Columns     | 71.1875 | 3  | 23.7292 | 9.9 | 0.0014 |
| Error       | 28.75   | 12 | 2.3958  |     |        |
| Total       | 99.9375 | 15 |         |     |        |

We also performed the non-parametric Kruskal-Wallis test (in R):

```
> kruskal.test(value ~ lineage, data = Fig3Ctop)
```

```
Kruskal-wallis rank sum test
```

```
data: value by lineage
```

```
Kruskal-wallis chi-squared = 10.211, df = 3, p-value = 0.01685
```

With an ANOVA p-value of **0.0014** and a Kruskal-Wallis p-value of **0.01685**, the treatments are significantly different at the alpha=0.05 level, and we continue with multiple comparisons testing with the Tukey HSD test (`multcompare` in MATLAB), and the Dunn's test (`PMCMR` package in R).

| log <sub>2</sub> MIC <sub>PIP</sub> of:      |                                              | lower bound  | difference between means | upper bound  | Tukey HSD p-value | Dunn's Test p-value |
|----------------------------------------------|----------------------------------------------|--------------|--------------------------|--------------|-------------------|---------------------|
| Day 1 PIP <sup>R</sup>                       | Day 40 PIP <sup>R</sup> CIP <sup>R</sup>     | -4.50        | -1.25                    | 2.00         | 0.6720            | 0.2126              |
| <b>Day 1 PIP<sup>R</sup></b>                 | <b>Day 1 CIP<sup>R</sup></b>                 | <b>-4.25</b> | <b>-1.00</b>             | <b>2.25</b>  | <b>0.7981</b>     | 0.2902              |
| Day 1 PIP <sup>R</sup>                       | Day 40 CIP <sup>R</sup> PIP <sup>R</sup>     | -8.75        | -5.50                    | -2.25        | 0.0015            | 0.0017              |
| Day 40 PIP <sup>R</sup> CIP <sup>R</sup>     | Day 1 CIP <sup>R</sup>                       | -3.00        | 0.25                     | 3.50         | 0.9956            | 0.8502              |
| <b>Day 40 PIP<sup>R</sup>CIP<sup>R</sup></b> | <b>Day 40 CIP<sup>R</sup>PIP<sup>R</sup></b> | <b>-7.50</b> | <b>-4.25</b>             | <b>-1.00</b> | <b>0.0101</b>     | 0.0589              |
| Day 1 CIP <sup>R</sup>                       | Day 40 CIP <sup>R</sup> PIP <sup>R</sup>     | -7.75        | -4.50                    | -1.25        | 0.0068            | 0.0377              |



**Fig 3C (middle)**

| log <sub>2</sub> MIC <sub>PIP</sub> of:  | Replicate |   |   |   |
|------------------------------------------|-----------|---|---|---|
|                                          | 1         | 2 | 3 | 4 |
| Day 1 TOB <sup>R</sup>                   | 3         | 3 | 2 | 3 |
| Day 40 TOB <sup>R</sup> CIP <sup>R</sup> | 1         | 2 | 1 | 2 |
| Day 1 CIP <sup>R</sup>                   | 3         | 4 | 3 | 4 |
| Day 40 CIP <sup>R</sup> TOB <sup>R</sup> | 3         | 4 | 3 | 4 |

A one-way ANOVA is performed (`anova1` in MATLAB) on the log<sub>2</sub> MIC<sub>PIP</sub> values of these lineages:

| ANOVA Table |         |    |        |      |        |
|-------------|---------|----|--------|------|--------|
| Source      | SS      | df | MS     | F    | Prob>F |
| Columns     | 10.6875 | 3  | 3.5625 | 11.4 | 0.0008 |
| Error       | 3.75    | 12 | 0.3125 |      |        |
| Total       | 14.4375 | 15 |        |      |        |

We also performed the non-parametric Kruskal-Wallis test (in R):

```
> kruskal.test(value ~ lineage, data = Fig3Cmiddle)
```

```
Kruskal-wallis rank sum test
```

```
data: value by lineage
```

```
Kruskal-wallis chi-squared = 10.788, df = 3, p-value = 0.01293
```

With an ANOVA p-value of **0.0008** and a Kruskal-Wallis p-value of **0.01293**, the treatments are significantly different at the alpha=0.05 level, and we continue with multiple comparisons testing with the Tukey HSD test (`multcompare` in MATLAB), and the Dunn's test (`PMCMR` package in R).

| log <sub>2</sub> MIC <sub>PIP</sub> of:      |                                              | lower bound  | difference between means | upper bound  | Tukey HSD p-value | Dunn's Test p-value |
|----------------------------------------------|----------------------------------------------|--------------|--------------------------|--------------|-------------------|---------------------|
| Day 1 TOB <sup>R</sup>                       | Day 40 TOB <sup>R</sup> CIP <sup>R</sup>     | 0.08         | 1.25                     | 2.42         | 0.0357            | 0.1166              |
| <b>Day 1 TOB<sup>R</sup></b>                 | <b>Day 1 CIP<sup>R</sup></b>                 | <b>-1.92</b> | <b>-0.75</b>             | <b>0.42</b>  | <b>0.2795</b>     | 0.2093              |
| Day 1 TOB <sup>R</sup>                       | Day 40 CIP <sup>R</sup> TOB <sup>R</sup>     | -1.92        | -0.75                    | 0.42         | 0.2795            | 0.2093              |
| Day 40 TOB <sup>R</sup> CIP <sup>R</sup>     | Day 1 CIP <sup>R</sup>                       | -3.17        | -2.00                    | -0.83        | 0.0014            | 0.0047              |
| <b>Day 40 TOB<sup>R</sup>CIP<sup>R</sup></b> | <b>Day 40 CIP<sup>R</sup>TOB<sup>R</sup></b> | <b>-3.17</b> | <b>-2.00</b>             | <b>-0.83</b> | <b>0.0014</b>     | 0.0047              |
| Day 1 CIP <sup>R</sup>                       | Day 40 CIP <sup>R</sup> TOB <sup>R</sup>     | -1.17        | 0.00                     | 1.17         | 1.0000            | 1.000               |

**Fig 3C (bottom)**

| log <sub>2</sub> MIC <sub>CIP</sub> of:  | Replicate |    |    |    |
|------------------------------------------|-----------|----|----|----|
|                                          | 1         | 2  | 3  | 4  |
| Day 1 TOB <sup>R</sup>                   | -1        | -2 | -2 | -2 |
| Day 40 TOB <sup>R</sup> CIP <sup>R</sup> | 4         | 3  | 3  | 3  |
| Day 1 CIP <sup>R</sup>                   | -1        | -2 | -3 | -1 |
| Day 40 CIP <sup>R</sup> TOB <sup>R</sup> | 2         | -1 | 2  | -1 |

A one-way ANOVA is performed (`anova1` in MATLAB) on the log<sub>2</sub> MIC<sub>CIP</sub> values of these lineages:

| ANOVA Table |         |    |         |       |              |
|-------------|---------|----|---------|-------|--------------|
| Source      | SS      | df | MS      | F     | Prob>F       |
| Columns     | 67.6875 | 3  | 22.5625 | 20.43 | 5.23348e-005 |
| Error       | 13.25   | 12 | 1.1042  |       |              |
| Total       | 80.9375 | 15 |         |       |              |

We also performed the non-parametric Kruskal-Wallis test (in R):

```
> kruskal.test(value ~ lineage, data = Fig3Cbottom)
```

```
Kruskal-wallis rank sum test
```

```
data: value by lineage
```

```
kruskal-wallis chi-squared = 11.901, df = 3, p-value = 0.00773
```

With an ANOVA p-value of  $5.23 \times 10^{-5}$  and a Kruskal-Wallis p-value of **0.00773**, the treatments are significantly different at the  $\alpha=0.05$  level, and we continue with multiple comparisons testing with the Tukey HSD test (`multcompare` in MATLAB), and the Dunn's test (PMCMR package in R).

| log <sub>2</sub> MIC <sub>CIP</sub> of:      |                                              | lower bound  | difference between means | upper bound | Tukey HSD p-value | Dunn's Test p-value |
|----------------------------------------------|----------------------------------------------|--------------|--------------------------|-------------|-------------------|---------------------|
| Day 1 TOB <sup>R</sup>                       | Day 40 TOB <sup>R</sup> CIP <sup>R</sup>     | -7.21        | -5.00                    | -2.79       | 1.08E-04          | 0.0026              |
| <b>Day 1 TOB<sup>R</sup></b>                 | <b>Day 1 CIP<sup>R</sup></b>                 | <b>-2.21</b> | <b>0.00</b>              | <b>2.21</b> | <b>1.0000</b>     | 0.8788              |
| Day 1 TOB <sup>R</sup>                       | Day 40 CIP <sup>R</sup> TOB <sup>R</sup>     | -4.46        | -2.25                    | -0.04       | 0.0451            | 0.1180              |
| Day 40 TOB <sup>R</sup> CIP <sup>R</sup>     | Day 1 CIP <sup>R</sup>                       | 2.79         | 5.00                     | 7.21        | 1.08E-04          | 0.0042              |
| <b>Day 40 TOB<sup>R</sup>CIP<sup>R</sup></b> | <b>Day 40 CIP<sup>R</sup>TOB<sup>R</sup></b> | <b>0.54</b>  | <b>2.75</b>              | <b>4.96</b> | <b>0.0139</b>     | 0.1474              |
| Day 1 CIP <sup>R</sup>                       | Day 40 CIP <sup>R</sup> TOB <sup>R</sup>     | -4.46        | -2.25                    | -0.04       | 0.0451            | 0.1584              |

## Collateral sensitivity (S4 Fig)

### S4A Fig (left)

| log <sub>2</sub> MIC <sub>TOB</sub> of: | Replicate |    |   |    |
|-----------------------------------------|-----------|----|---|----|
|                                         | 1         | 2  | 3 | 4  |
| Day 1 CIP <sup>R</sup>                  | 2         | 3  | 3 | 2  |
| Day 20 CIP <sup>R</sup>                 | -1        | -2 | 0 | -2 |
| Day 1 Control                           | 1         | 1  | 1 | 1  |
| Day 20 Control                          | 1         | 1  | 2 | 2  |

A one-way ANOVA is performed (`anova1` in MATLAB) on the log<sub>2</sub> MIC<sub>TOB</sub> values of these lineages:

| ANOVA Table |         |    |         |       |              |
|-------------|---------|----|---------|-------|--------------|
| Source      | SS      | df | MS      | F     | Prob>F       |
| Columns     | 30.1875 | 3  | 10.0625 | 25.42 | 1.74077e-005 |
| Error       | 4.75    | 12 | 0.3958  |       |              |
| Total       | 34.9375 | 15 |         |       |              |

We also performed the non-parametric Kruskal-Wallis test (in R):

```
> kruskal.test(value ~ lineage, data = Figs4Aleft)
```

```
Kruskal-wallis rank sum test
```

```
data: value by lineage
```

```
kruskal-wallis chi-squared = 13.175, df = 3, p-value = 0.004272
```

With an ANOVA p-value of  $1.74 \times 10^{-5}$  and a Kruskal-Wallis p-value of **0.004272**, the treatments are significantly different at the alpha=0.05 level, and we continue with multiple comparisons testing with the Tukey HSD test (`multcompare` in MATLAB), and the Dunn's test (PMCMR package in R).

| log <sub>2</sub> MIC <sub>TOB</sub> of: |                               | lower bound  | difference between means | upper bound | Tukey HSD p-value | Dunn's Test p-value |
|-----------------------------------------|-------------------------------|--------------|--------------------------|-------------|-------------------|---------------------|
| <b>Day 1 CIP<sup>R</sup></b>            | <b>Day 20 CIP<sup>R</sup></b> | <b>2.43</b>  | <b>3.75</b>              | <b>5.07</b> | <b>1.14E-05</b>   | 0.0004              |
| Day 1 CIP <sup>R</sup>                  | Day 1 Control                 | 0.18         | 1.50                     | 2.82        | 0.0248            | 0.0454              |
| Day 1 CIP <sup>R</sup>                  | Day 20 Control                | -0.32        | 1.00                     | 2.32        | 0.1656            | 0.2181              |
| Day 20 CIP <sup>R</sup>                 | Day 1 Control                 | -3.57        | -2.25                    | -0.93       | 0.0014            | 0.1237              |
| Day 20 CIP <sup>R</sup>                 | Day 20 Control                | -4.07        | -2.75                    | -1.43       | 2.39E-04          | 0.0209              |
| <b>Day 1 Control</b>                    | <b>Day 20 Control</b>         | <b>-1.82</b> | <b>-0.50</b>             | <b>0.82</b> | <b>0.6825</b>     | 0.4415              |

### S4A Fig (right)

| log <sub>2</sub> MIC <sub>PIP</sub> of: | Replicate |   |   |   |
|-----------------------------------------|-----------|---|---|---|
|                                         | 1         | 2 | 3 | 4 |
| Day 1 CIP <sup>R</sup>                  | 3         | 4 | 3 | 4 |
| Day 20 CIP <sup>R</sup>                 | 2         | 2 | 1 | 2 |
| Day 1 Control                           | 2         | 3 | 2 | 2 |
| Day 20 Control                          | 3         | 3 | 4 | 3 |

A one-way ANOVA is performed (`anova1` in MATLAB) on the log<sub>2</sub> MIC<sub>PIP</sub> values of these lineages:

| ANOVA Table |         |    |         |       |        |
|-------------|---------|----|---------|-------|--------|
| Source      | SS      | df | MS      | F     | Prob>F |
| Columns     | 8.1875  | 3  | 2.72917 | 10.08 | 0.0013 |
| Error       | 3.25    | 12 | 0.27083 |       |        |
| Total       | 11.4375 | 15 |         |       |        |

We also performed the non-parametric Kruskal-Wallis test (in R):

```
> kruskal.test(value ~ lineage, data = Figs4Aright)
```

```
Kruskal-wallis rank sum test
```

```
data: value by lineage
```

```
Kruskal-wallis chi-squared = 11.454, df = 3, p-value = 0.009507
```

With an ANOVA p-value of **0.009507** and a Kruskal-Wallis p-value of **0.009507**, the treatments are significantly different at the alpha=0.05 level, and we continue with multiple comparisons testing with the Tukey HSD test (`multcompare` in MATLAB), and the Dunn's test (PMCMR package in R).

| log <sub>2</sub> MIC <sub>PIP</sub> of: |                               | lower bound  | difference between means | upper bound | Tukey HSD p-value | Dunn's Test p-value |
|-----------------------------------------|-------------------------------|--------------|--------------------------|-------------|-------------------|---------------------|
| <b>Day 1 CIP<sup>R</sup></b>            | <b>Day 20 CIP<sup>R</sup></b> | <b>0.66</b>  | <b>1.75</b>              | <b>2.84</b> | <b>0.0023</b>     | 0.0041              |
| Day 1 CIP <sup>R</sup>                  | Day 1 Control                 | 0.16         | 1.25                     | 2.34        | 0.0237            | 0.0337              |
| Day 1 CIP <sup>R</sup>                  | Day 20 Control                | -0.84        | 0.25                     | 1.34        | 0.9029            | 0.7233              |
| Day 20 CIP <sup>R</sup>                 | Day 1 Control                 | -1.59        | -0.50                    | 0.59        | 0.5461            | 0.4549              |
| Day 20 CIP <sup>R</sup>                 | Day 20 Control                | -2.59        | -1.50                    | -0.41       | 0.0072            | 0.0118              |
| <b>Day 1 Control</b>                    | <b>Day 20 Control</b>         | <b>-2.09</b> | <b>-1.00</b>             | <b>0.09</b> | <b>0.0769</b>     | 0.0767              |

## S4B Fig

| log <sub>2</sub> MIC <sub>TOB</sub> of:  | Replicate |   |   |   |
|------------------------------------------|-----------|---|---|---|
|                                          | 1         | 2 | 3 | 4 |
| Day 1 Control                            | 1         | 1 | 1 | 1 |
| Day 20 PIP <sup>R</sup>                  | 1         | 1 | 2 | 3 |
| Day 20 Control                           | 1         | 1 | 2 | 2 |
| Day 40 PIP <sup>R</sup> CIP <sup>R</sup> | 0         | 0 | 0 | 0 |

A one-way ANOVA is performed (`anova1` in MATLAB) on the log<sub>2</sub> MIC<sub>TOB</sub> values of these lineages:

| ANOVA Table |         |    |         |      |        |
|-------------|---------|----|---------|------|--------|
| Source      | SS      | df | MS      | F    | Prob>F |
| Columns     | 7.1875  | 3  | 2.39583 | 7.67 | 0.004  |
| Error       | 3.75    | 12 | 0.3125  |      |        |
| Total       | 10.9375 | 15 |         |      |        |

We also performed the non-parametric Kruskal-Wallis test (in R):

```
> kruskal.test(value ~ lineage, data = Figs4B)
```

```
Kruskal-wallis rank sum test
```

```
data: value by lineage
```

```
kruskal-wallis chi-squared = 11.16, df = 3, p-value = 0.01089
```

With an ANOVA p-value of **0.004** and a Kruskal-Wallis p-value of **0.01089**, the treatments are significantly different at the alpha=0.05 level, and we continue with multiple comparisons testing with the Tukey HSD test (`multcompare` in MATLAB), and the Dunn's test (`PMCMR` package in R).

| log <sub>2</sub> MIC <sub>TOB</sub> of: |                                              | lower bound  | difference between means | upper bound | Tukey HSD p-value | Dunn's Test p-value |
|-----------------------------------------|----------------------------------------------|--------------|--------------------------|-------------|-------------------|---------------------|
| Day 1 Control                           | Day 20 PIP <sup>R</sup>                      | -1.92        | -0.75                    | 0.42        | 0.2795            | 0.297               |
| <b>Day 1 Control</b>                    | <b>Day 20 Control</b>                        | <b>-1.67</b> | <b>-0.50</b>             | <b>0.67</b> | <b>0.6005</b>     | 0.377               |
| Day 1 Control                           | Day 40 PIP <sup>R</sup> CIP <sup>R</sup>     | -0.17        | 1.00                     | 2.17        | 0.1052            | 0.054               |
| Day 20 PIP <sup>R</sup>                 | Day 20 Control                               | -0.92        | 0.25                     | 1.42        | 0.9196            | 0.872               |
| <b>Day 20 PIP<sup>R</sup></b>           | <b>Day 40 PIP<sup>R</sup>CIP<sup>R</sup></b> | <b>0.58</b>  | <b>1.75</b>              | <b>2.92</b> | <b>0.0040</b>     | 0.003               |
| Day 20 Control                          | Day 40 PIP <sup>R</sup> CIP <sup>R</sup>     | 0.33         | 1.50                     | 2.67        | 0.0118            | 0.005               |

## S4C Fig

| log <sub>2</sub> MIC <sub>PIP</sub> of:  | Replicate |   |   |   |
|------------------------------------------|-----------|---|---|---|
|                                          | 1         | 2 | 3 | 4 |
| Day 1 Control                            | 2         | 3 | 2 | 2 |
| Day 20 TOB <sup>R</sup>                  | 3         | 3 | 3 | 4 |
| Day 20 Control                           | 3         | 3 | 4 | 3 |
| Day 40 TOB <sup>R</sup> CIP <sup>R</sup> | 1         | 2 | 1 | 2 |

A one-way ANOVA is performed (`anova1` in MATLAB) on the log<sub>2</sub> MIC<sub>PIP</sub> values of these lineages:

| ANOVA Table |         |    |         |       |        |
|-------------|---------|----|---------|-------|--------|
| Source      | SS      | df | MS      | F     | Prob>F |
| Columns     | 8.6875  | 3  | 2.89583 | 10.69 | 0.001  |
| Error       | 3.25    | 12 | 0.27083 |       |        |
| Total       | 11.9375 | 15 |         |       |        |

We also performed the non-parametric Kruskal-Wallis test (in R):

```
> kruskal.test(value ~ lineage, data = Figs4C)
```

```
Kruskal-wallis rank sum test
```

```
data: value by lineage
```

```
Kruskal-wallis chi-squared = 11.53, df = 3, p-value = 0.009178
```

With an ANOVA p-value of **0.001** and a Kruskal-Wallis p-value of **0.009178**, the treatments are significantly different at the alpha=0.05 level, and we continue with multiple comparisons testing with the Tukey HSD test (`multcompare` in MATLAB), and the Dunn's test (`PMCMR` package in R).

| log <sub>2</sub> MIC <sub>PIP</sub> of: |                                              | lower bound  | difference between means | upper bound | Tukey HSD p-value | Dunn's Test p-value |
|-----------------------------------------|----------------------------------------------|--------------|--------------------------|-------------|-------------------|---------------------|
| Day 1 Control                           | Day 20 TOB <sup>R</sup>                      | -2.09        | -1.00                    | 0.09        | 0.0769            | 0.0758              |
| <b>Day 1 Control</b>                    | <b>Day 20 Control</b>                        | <b>-2.09</b> | <b>-1.00</b>             | <b>0.09</b> | <b>0.0769</b>     | 0.0758              |
| Day 1 Control                           | Day 40 TOB <sup>R</sup> CIP <sup>R</sup>     | -0.34        | 0.75                     | 1.84        | 0.2280            | 0.3049              |
| Day 20 TOB <sup>R</sup>                 | Day 20 Control                               | -1.09        | 0.00                     | 1.09        | 1.0000            | 1.000               |
| <b>Day 20 TOB<sup>R</sup></b>           | <b>Day 40 TOB<sup>R</sup>CIP<sup>R</sup></b> | <b>0.66</b>  | <b>1.75</b>              | <b>2.84</b> | <b>0.0023</b>     | 0.0051              |
| Day 20 Control                          | Day 40 TOB <sup>R</sup> CIP <sup>R</sup>     | 0.66         | 1.75                     | 2.84        | 0.0023            | 0.0051              |

## Piperacillin-resistant clinical isolates (Fig 7 of main text)

### Clinical Isolate #1

|     |  | Raw values                                         |   |   |                          |   |   |               |   |   |
|-----|--|----------------------------------------------------|---|---|--------------------------|---|---|---------------|---|---|
|     |  | $\log_2(\text{MIC Piperacillin}) (\mu\text{g/ml})$ |   |   |                          |   |   |               |   |   |
|     |  | Clinical Isolate 1                                 |   |   |                          |   |   |               |   |   |
|     |  | Evolved to tobramycin                              |   |   | Evolved to ciprofloxacin |   |   | Evolved to LB |   |   |
|     |  | 1                                                  | 2 | 3 | 1                        | 2 | 3 | 1             | 2 | 3 |
| Day |  |                                                    |   |   |                          |   |   |               |   |   |
| 1   |  | 6                                                  | 7 | 5 | 6                        | 5 | 6 | 7             | 7 | 7 |
| 10  |  | 2                                                  | 7 | 5 | 5                        | 6 | 6 | 8             | 8 | 8 |

|     |  | Normalized values                                  |      |       |                          |       |      |               |      |      |
|-----|--|----------------------------------------------------|------|-------|--------------------------|-------|------|---------------|------|------|
|     |  | $\log_2(\text{MIC Piperacillin}) (\mu\text{g/ml})$ |      |       |                          |       |      |               |      |      |
|     |  | Clinical Isolate 1                                 |      |       |                          |       |      |               |      |      |
|     |  | Evolved to tobramycin                              |      |       | Evolved to ciprofloxacin |       |      | Evolved to LB |      |      |
|     |  | 1                                                  | 2    | 3     | 1                        | 2     | 3    | 1             | 2    | 3    |
| Day |  |                                                    |      |       |                          |       |      |               |      |      |
| 1   |  | 0.00                                               | 1.00 | -1.00 | 0.33                     | -0.67 | 0.33 | 0.00          | 0.00 | 0.00 |
| 10  |  | -4.00                                              | 1.00 | -1.00 | -0.67                    | 0.33  | 0.33 | 1.00          | 1.00 | 1.00 |

The normalized values are calculated by subtracting the average of the Day 1  $\log_2 \text{MIC}_{\text{PIP}}$  values from the raw values. More explicitly,

Normalized  $\log_2 \text{MIC}_{\text{PIP}}$  of Day 1 Clinical Isolate #1 evolved to tobramycin:

$$[6 \ 7 \ 5] - \text{mean}([6 \ 7 \ 5]) = [0 \ 1 \ -1]$$

Normalized  $\log_2 \text{MIC}_{\text{PIP}}$  of Day 10 Clinical Isolate #1 evolved to tobramycin:

$$[2 \ 7 \ 5] - \text{mean}([6 \ 7 \ 5]) = [-4 \ 1 \ -1]$$

Normalized  $\log_2 \text{MIC}_{\text{PIP}}$  of Day 1 Clinical Isolate #1 evolved to ciprofloxacin:

$$[6 \ 5 \ 6] - \text{mean}([6 \ 5 \ 6]) = [0.33 \ -0.67 \ 0.33]$$

Normalized  $\log_2 \text{MIC}_{\text{PIP}}$  of Day 10 Clinical Isolate #1 evolved to ciprofloxacin:

$$[5 \ 6 \ 6] - \text{mean}([6 \ 5 \ 6]) = [-0.67 \ 0.33 \ 0.33]$$

Normalized  $\log_2 \text{MIC}_{\text{PIP}}$  of Day 1 Clinical Isolate #1 evolved to LB:

$$[7 \ 7 \ 7] - \text{mean}([7 \ 7 \ 7]) = [0 \ 0 \ 0]$$

Normalized  $\log_2 \text{MIC}_{\text{PIP}}$  of Day 10 Clinical Isolate #1 evolved to LB:

```
[8 8 8] - mean([7 7 7]) = [1 1 1]
```

Similar calculations are done for Clinical Isolates #2 and #3.

Next, a one-way ANOVA is performed (`anova1` in MATLAB) on the normalized Day 10  $\log_2$  MIC<sub>PIP</sub> values:

| ANOVA Table |         |    |         |      |        |
|-------------|---------|----|---------|------|--------|
| Source      | SS      | df | MS      | F    | Prob>F |
| Columns     | 8.2222  | 2  | 4.11111 | 1.85 | 0.2367 |
| Error       | 13.3333 | 6  | 2.22222 |      |        |
| Total       | 21.5556 | 8  |         |      |        |

We also performed the non-parametric Kruskal-Wallis test (in R):

```
> kruskal.test(value ~ lineage, data = PIPRCI1)
```

```
Kruskal-wallis rank sum test
```

```
data: value by lineage
```

```
Kruskal-wallis chi-squared = 4.1835, df = 2, p-value = 0.1235
```

With an ANOVA p-value of **0.2367** and a Kruskal-Wallis p-value of **0.1235**, the treatments are not significantly different at the  $\alpha=0.05$  level, and we do not continue with multiple comparisons testing.



## Clinical Isolate #2

|     |    | Raw values                                         |   |   |                          |   |   |               |   |   |
|-----|----|----------------------------------------------------|---|---|--------------------------|---|---|---------------|---|---|
|     |    | $\log_2(\text{MIC Piperacillin}) (\mu\text{g/ml})$ |   |   |                          |   |   |               |   |   |
|     |    | Clinical Isolate 2                                 |   |   |                          |   |   |               |   |   |
|     |    | Evolved to tobramycin                              |   |   | Evolved to ciprofloxacin |   |   | Evolved to LB |   |   |
|     |    | 1                                                  | 2 | 3 | 1                        | 2 | 3 | 1             | 2 | 3 |
| Day | 1  | 5                                                  | 5 | 5 | 5                        | 5 | 5 | 8             | 7 | 7 |
| Day | 10 | 7                                                  | 6 | 7 | 2                        | 4 | 4 | 8             | 8 | 8 |

|     |    | Normalized values                                  |      |      |                          |       |       |               |       |       |
|-----|----|----------------------------------------------------|------|------|--------------------------|-------|-------|---------------|-------|-------|
|     |    | $\log_2(\text{MIC Piperacillin}) (\mu\text{g/ml})$ |      |      |                          |       |       |               |       |       |
|     |    | Clinical Isolate 2                                 |      |      |                          |       |       |               |       |       |
|     |    | Evolved to tobramycin                              |      |      | Evolved to ciprofloxacin |       |       | Evolved to LB |       |       |
|     |    | 1                                                  | 2    | 3    | 1                        | 2     | 3     | 1             | 2     | 3     |
| Day | 1  | 0.00                                               | 0.00 | 0.00 | 0.00                     | 0.00  | 0.00  | 0.67          | -0.33 | -0.33 |
| Day | 10 | 2.00                                               | 1.00 | 2.00 | -3.00                    | -1.00 | -1.00 | 0.67          | 0.67  | 0.67  |

A one-way ANOVA is performed (`anova1` in MATLAB) on the normalized Day 10  $\log_2$  MIC<sub>PIP</sub> values:

| ANOVA Table |         |    |         |      |        |
|-------------|---------|----|---------|------|--------|
| Source      | SS      | df | MS      | F    | Prob>F |
| Columns     | 17.5556 | 2  | 8.77778 | 15.8 | 0.0041 |
| Error       | 3.3333  | 6  | 0.55556 |      |        |
| Total       | 20.8889 | 8  |         |      |        |

We also performed the non-parametric Kruskal-Wallis test (in R):

```
> kruskal.test(value ~ lineage, data = PIPRCI2)
```

```
Kruskal-wallis rank sum test
```

```
data: value by lineage
```

```
kruskal-wallis chi-squared = 7.5789, df = 2, p-value = 0.02261
```

With an **ANOVA p-value of 0.0041** and a **Kruskal-Wallis p-value of 0.02261**, the treatments are significantly different at the  $\alpha=0.05$  level, and we continue with multiple comparisons testing with the Tukey HSD test (`multcompare` in MATLAB), and the Dunn's test (`PMCMR` package in R).

| Day 10 $\log_2$ MIC <sub>PIP</sub> of Clinical Isolate #2 |                          | lower bound  | difference between means | upper bound  | Tukey HSD p-value | Dunn's Test p-value |
|-----------------------------------------------------------|--------------------------|--------------|--------------------------|--------------|-------------------|---------------------|
| Evolved to tobramycin                                     | Evolved to ciprofloxacin | 1.47         | 3.33                     | 5.20         | 0.0037            | 0.0059              |
| Evolved to tobramycin                                     | Evolved to LB            | -0.87        | 1.00                     | 2.87         | 0.3000            | 0.1687              |
| <b>Evolved to ciprofloxacin</b>                           | <b>Evolved to LB</b>     | <b>-4.20</b> | <b>-2.33</b>             | <b>-0.47</b> | <b>0.0202</b>     | 0.1687              |

### Clinical Isolate #3

| Raw values                                         |   |   |                          |   |   |               |    |    |
|----------------------------------------------------|---|---|--------------------------|---|---|---------------|----|----|
| $\log_2(\text{MIC Piperacillin}) (\mu\text{g/ml})$ |   |   |                          |   |   |               |    |    |
| Clinical Isolate 3                                 |   |   |                          |   |   |               |    |    |
| Evolved to tobramycin                              |   |   | Evolved to ciprofloxacin |   |   | Evolved to LB |    |    |
| 1                                                  | 2 | 3 | 1                        | 2 | 3 | 1             | 2  | 3  |
| 7                                                  | 7 | 7 | 8                        | 7 | 7 | 9             | 9  | 9  |
| 7                                                  | 8 | 9 | 5                        | 5 | 5 | 12            | 11 | 11 |

| Normalized values                                  |      |      |                          |       |       |               |      |      |
|----------------------------------------------------|------|------|--------------------------|-------|-------|---------------|------|------|
| $\log_2(\text{MIC Piperacillin}) (\mu\text{g/ml})$ |      |      |                          |       |       |               |      |      |
| Clinical Isolate 3                                 |      |      |                          |       |       |               |      |      |
| Evolved to tobramycin                              |      |      | Evolved to ciprofloxacin |       |       | Evolved to LB |      |      |
| 1                                                  | 2    | 3    | 1                        | 2     | 3     | 1             | 2    | 3    |
| 0.00                                               | 0.00 | 0.00 | 0.67                     | -0.33 | -0.33 | 0.00          | 0.00 | 0.00 |
| 0.00                                               | 1.00 | 2.00 | -2.33                    | -2.33 | -2.33 | 3.00          | 2.00 | 2.00 |

A one-way ANOVA is performed (`anova1` in MATLAB) on the normalized Day 10  $\log_2$  MIC<sub>PIP</sub> values:

| ANOVA Table |         |    |         |    |        |
|-------------|---------|----|---------|----|--------|
| Source      | SS      | df | MS      | F  | Prob>F |
| Columns     | 34.6667 | 2  | 17.3333 | 39 | 0.0004 |
| Error       | 2.6667  | 6  | 0.4444  |    |        |
| Total       | 37.3333 | 8  |         |    |        |

We also performed the non-parametric Kruskal-Wallis test (in R):

```
> kruskal.test(value ~ lineage, data = PIPRCI3)
```

```
Kruskal-wallis rank sum test
```

```
data: value by lineage
```

```
kruskal-wallis chi-squared = 6.9524, df = 2, p-value = 0.03092
```

With an ANOVA p-value of **0.0004** and a Kruskal-Wallis p-value of **0.03092** and a Kruskal-Wallis p-value of **0.03092**, the treatments are significantly different at the alpha=0.05 level, and we continue with multiple comparisons testing with the Tukey HSD test (`multcompare` in MATLAB).

| Day 10 log <sub>2</sub> MIC <sub>PIP</sub> of Clinical Isolate #3 |                          | lower bound  | difference between means | upper bound  | Tukey HSD p-value | Dunn's Test p-value |
|-------------------------------------------------------------------|--------------------------|--------------|--------------------------|--------------|-------------------|---------------------|
| Evolved to tobramycin                                             | Evolved to ciprofloxacin | 1.66         | 3.33                     | 5.00         | 0.0021            | 0.1228              |
| Evolved to tobramycin                                             | Evolved to LB            | -3.00        | -1.33                    | 0.34         | 0.1089            | 0.2801              |
| <b>Evolved to ciprofloxacin</b>                                   | <b>Evolved to LB</b>     | <b>-6.34</b> | <b>-4.67</b>             | <b>-3.00</b> | <b>0.0003</b>     | 0.0087              |

**Hocquet Isolates (Fig 8 of main text)**

**A<sub>WT</sub> vs. A<sub>PM</sub>**

|     |    | Raw values                                |   |   |                 |   |   | Normalized values                         |      |      |                 |      |      |
|-----|----|-------------------------------------------|---|---|-----------------|---|---|-------------------------------------------|------|------|-----------------|------|------|
|     |    | log <sub>2</sub> (MIC Tobramycin) (µg/ml) |   |   |                 |   |   | log <sub>2</sub> (MIC Tobramycin) (µg/ml) |      |      |                 |      |      |
|     |    | A <sub>WT</sub>                           |   |   | A <sub>PM</sub> |   |   | A <sub>WT</sub>                           |      |      | A <sub>PM</sub> |      |      |
|     |    | 1                                         | 2 | 3 | 1               | 2 | 3 | 1                                         | 2    | 3    | 1               | 2    | 3    |
| Day |    |                                           |   |   |                 |   |   |                                           |      |      |                 |      |      |
|     | 1  | 0                                         | 2 | 3 | 1               | 1 | 1 | -1.67                                     | 0.33 | 1.33 | 0.00            | 0.00 | 0.00 |
|     | 15 | 6                                         | 6 | 5 | 3               | 2 | 3 | 4.33                                      | 4.33 | 3.33 | 2.00            | 1.00 | 2.00 |

The normalized values are calculated by subtracting the average of the Day 1 log<sub>2</sub> MIC<sub>TOB</sub> values from the raw values. More explicitly,

Normalized log<sub>2</sub> MIC<sub>TOB</sub> of Day 1 A<sub>WT</sub>:

$$[0 \ 2 \ 3] - \text{mean}([0 \ 2 \ 3]) = [-1.67 \ 0.33 \ 1.33]$$

Normalized log<sub>2</sub> MIC<sub>TOB</sub> of Day 1 A<sub>PM</sub>:

$$[1 \ 1 \ 1] - \text{mean}([1 \ 1 \ 1]) = [0 \ 0 \ 0]$$

Normalized log<sub>2</sub> MIC<sub>TOB</sub> of Day 15 A<sub>WT</sub>:

$$[6 \ 6 \ 5] - \text{mean}([0 \ 2 \ 3]) = [4.33 \ 4.33 \ 3.33]$$

Normalized log<sub>2</sub> MIC<sub>TOB</sub> of Day 15 A<sub>PM</sub>:

$$[3 \ 2 \ 3] - \text{mean}([1 \ 1 \ 1]) = [2 \ 1 \ 2]$$

A two-sample t-test is (`ttest2` in MATLAB) then performed on the normalized log<sub>2</sub> MIC<sub>TOB</sub> values of Day 15 A<sub>WT</sub> vs. Day 15 A<sub>PM</sub> and yields **p= 0.0078**.

A Wilcoxon rank sum test (`ranksum` in MATLAB) was also performed on the normalized log<sub>2</sub> MIC<sub>TOB</sub> values of Day 15 A<sub>WT</sub> vs. Day 15 A<sub>PM</sub> and yielded **p= 0.1**. Note that the smallest p-value that can be detected with a two-sided Wilcoxon rank sum test with three samples in both groups is 0.1.

Similar calculations are done for the B, C, and D pairs of clinical isolates.

**B<sub>WT</sub> vs. B<sub>PM</sub>**

|     |  | Raw values                                       |   |   |                 |   |    | Normalized values                                |      |       |                 |   |      |
|-----|--|--------------------------------------------------|---|---|-----------------|---|----|--------------------------------------------------|------|-------|-----------------|---|------|
|     |  | $\log_2(\text{MIC Tobramycin}) (\mu\text{g/ml})$ |   |   |                 |   |    | $\log_2(\text{MIC Tobramycin}) (\mu\text{g/ml})$ |      |       |                 |   |      |
|     |  | B <sub>WT</sub>                                  |   |   | B <sub>PM</sub> |   |    | B <sub>WT</sub>                                  |      |       | B <sub>PM</sub> |   |      |
|     |  | 1                                                | 2 | 3 | 1               | 2 | 3  | 1                                                | 2    | 3     | 1               | 2 | 3    |
| Day |  |                                                  |   |   |                 |   |    |                                                  |      |       |                 |   |      |
| 1   |  | 1                                                | 2 | 1 | -2              |   | -2 | -0.33                                            | 0.67 | -0.33 | 0.00            |   | 0.00 |
| 15  |  | 6                                                | 6 | 7 | -1              |   | 1  | 4.67                                             | 4.67 | 5.67  | 1.00            |   | 3.00 |

Two-sample t-test of normalized Day 15 B<sub>WT</sub> vs. Day 15 B<sub>PM</sub> yields: **p = 0.040**

A Wilcoxon rank sum test (`ranksum` in MATLAB) was also performed on the normalized  $\log_2$  MIC<sub>TOB</sub> values of Day 15 B<sub>WT</sub> vs. Day 15 B<sub>PM</sub> and yielded **p= 0.1**. Note that the smallest p-value that can be detected with a two-sided Wilcoxon rank sum test with three samples in both groups is 0.1.

## C<sub>WT</sub> vs. C<sub>PM</sub>

|     |  | Raw values                                       |   |   |                 |   |   | Normalized values                                |      |      |                 |      |      |
|-----|--|--------------------------------------------------|---|---|-----------------|---|---|--------------------------------------------------|------|------|-----------------|------|------|
|     |  | $\log_2(\text{MIC Tobramycin}) (\mu\text{g/ml})$ |   |   |                 |   |   | $\log_2(\text{MIC Tobramycin}) (\mu\text{g/ml})$ |      |      |                 |      |      |
|     |  | C <sub>WT</sub>                                  |   |   | C <sub>PM</sub> |   |   | C <sub>WT</sub>                                  |      |      | C <sub>PM</sub> |      |      |
|     |  | 1                                                | 2 | 3 | 1               | 2 | 3 | 1                                                | 2    | 3    | 1               | 2    | 3    |
| Day |  |                                                  |   |   |                 |   |   |                                                  |      |      |                 |      |      |
| 1   |  | 1                                                | 2 | 2 | 1               | 1 | 1 | -0.67                                            | 0.33 | 0.33 | 0.00            | 0.00 | 0.00 |
| 15  |  | 5                                                | 6 | 6 | 2               | 3 | 4 | 3.33                                             | 4.33 | 4.33 | 1.00            | 2.00 | 3.00 |

Two-sample t-test of normalized Day 15 C<sub>WT</sub> vs. Day 15 C<sub>PM</sub> yields: **p = 0.040**

A Wilcoxon rank sum test (`ranksum` in MATLAB) was also performed on the normalized  $\log_2$  MIC<sub>TOB</sub> values of Day 15 C<sub>WT</sub> vs. Day 15 C<sub>PM</sub> and yielded **p = 0.1**. Note that the smallest p-value that can be detected with a two-sided Wilcoxon rank sum test with three samples in both groups is 0.1.

**D<sub>WT</sub> vs. D<sub>PM</sub>**

|     |  | Raw values                                       |   |   |                 |   |   | Normalized values                                |       |      |                 |      |      |
|-----|--|--------------------------------------------------|---|---|-----------------|---|---|--------------------------------------------------|-------|------|-----------------|------|------|
|     |  | $\log_2(\text{MIC Tobramycin}) (\mu\text{g/ml})$ |   |   |                 |   |   | $\log_2(\text{MIC Tobramycin}) (\mu\text{g/ml})$ |       |      |                 |      |      |
|     |  | D <sub>WT</sub>                                  |   |   | D <sub>PM</sub> |   |   | D <sub>WT</sub>                                  |       |      | D <sub>PM</sub> |      |      |
|     |  | 1                                                | 2 | 3 | 1               | 2 | 3 | 1                                                | 2     | 3    | 1               | 2    | 3    |
| Day |  |                                                  |   |   |                 |   |   |                                                  |       |      |                 |      |      |
| 1   |  | 1                                                | 1 | 2 | 1               | 1 | 1 | -0.33                                            | -0.33 | 0.67 | 0.00            | 0.00 | 0.00 |
| 15  |  | 4                                                | 4 | 4 | 4               | 3 | 4 | 2.67                                             | 2.67  | 2.67 | 3.00            | 2.00 | 3.00 |

Two-sample t-test of normalized Day 15 D<sub>WT</sub> vs. Day 15 D<sub>PM</sub> yields: **p = 1**

A Wilcoxon rank sum test (`ranksum` in MATLAB) was also performed on the normalized  $\log_2$  MIC<sub>TOB</sub> values of Day 15 D<sub>WT</sub> vs. Day 15 D<sub>PM</sub> and yielded **p= 0.4**.
